# Supplementary material for: A fluorescent probe for sensing of hydrogen sulfide in living cells by adopting the adjacent-group participation strategy
Source: Research Square preprint supplement (doi:10.21203/rs.3.rs-5871966/v1), 2025-01-23
Supplement: Supplementary file 1 [file da2403d14c70129d1826a72c.docx]

**Supplementary Information**

**A fluorescent probe for sensing of hydrogen sulfide in living cells by adopting the adjacent-group participation strategy**

Yuting Du*, Hongliang Wang, Xingyu Xu, Jiayi Wang, Minmin Guo, Jinyu Sun

*Department of Chemistry, Xinzhou Normal University, Xinzhou, Shanxi 034000, China*

*Corresponding author. E-mail: yutingdu123@163.com

***Synthesis of Compound DPM-H2S***

The synthesis process of the compound a and **DPM** were synthesized according to the procedures published previously[31-32, 40]. Synthesis of **DPM-H2S**: The compound **DPM** (450.0 mg, 1.7 mmol) and anhydrous potassium carbonate (468.0 mg, 3.4 mmol) were mixed in 20 mL of acetonitrile, then the mixture was stirred at room temperature for 1 hour under nitrogen atmosphere. During the stirring, a solution of 1-fluoro-2,4-dinitrobenzene (375 mg, 2.0 mmol) in acetonitrile was dropped into the mixture through a syringe. Then the mixture was heated to 50 ℃ for 16 hours. After the reaction was completed, the mixture was cooled to room temperature, and the solvent was removed by evaporation under reduced pressure. The crude product was extracted from the water with dichloromethane (3 × 20 mL), the organic phase was collected, and dried over anhydrous magnesium sulfate. Finally, the crude product was purified by silica gel column chromatography (eluent: EA/PE = 1/5, v/v) to obtain faint yellow solid **DPM-H2S** (216.0 g, yield 48.0%). 1H NMR (500 MHz, CDCl3, ppm) δ 10.15 (s, 1H), 8.96 (s, 1H), 8.56 (s, 1H), 8.19 (d, *J* = 5 Hz, 1H), 8.02 (d, *J* = 10 Hz, 1H), 7.94 (d, *J* = 5 Hz, 1H), 7.86 (d, *J* = 10 Hz, 1H), 7.51 (t, *J* = 5, 10 Hz, 1H), 7.41 (t, *J* = 5, 10 Hz, 1H), 6.74 (d, *J* = 10 Hz, 1H); 13C NMR (125 MHz, CDCl3) δ (ppm): 187.60, 159.55, 155.98, 152.46, 148.53, 141.84, 138.53, 137.11, 135.44, 134.41, 129.05, 128.82, 127.94, 126.81, 126.12, 122.44, 121.62, 116.00; HRMS (negative ion mode, m/z) for [**DPM-H2S**-H]-: calcd.: 497.9390.

**Table S1.** A comparison of fluorescent probes for the detection of H2S.

| Probe | Solvent | Ex/Em  (nm) | Response time  (s) | Stokes shift | Ref. |
| --- | --- | --- | --- | --- | --- |
|  | DMF / PBS = 1: 1, v/v | Ex=540  Em=670 | 180 | 130 | 24 |
|  | PBS buffer (10 mM, pH 7.4, 1 % DMSO, v/v) | Ex=565  Em=620 | 1800 | 55 | 25 |
|  | PBS buffer (50 mM, pH 7.4, 10% DMSO, v/v) | Ex=590  Em=671 | 1800 | 81 | 26 |
|  | DMSO/H2O  (5/5, v/v) | Ex=572  Em=647 | 180 | 75 | 27 |
|  | CH3CN / PBS buffer (v/v = 1:1) | Ex=436  Em=542 | 5 | 106 | This work |

**Table S2.** A comparison of the absolute fluorescent quantum yield (*Φ*fl(%)) of **DPM-H2S** in different solvents.

| Solvents | Acetonitrile | Dimethyl sulfoxide | Methanol | Ethanol | THF |
| --- | --- | --- | --- | --- | --- |
| *Φ*fl(%) | 30.48 | 29.12 | 23.21 | 13.56 | 8.9 |





**Scheme S1.** The process of Excited-State Intramolecular Proton Transfer of **DPM**.


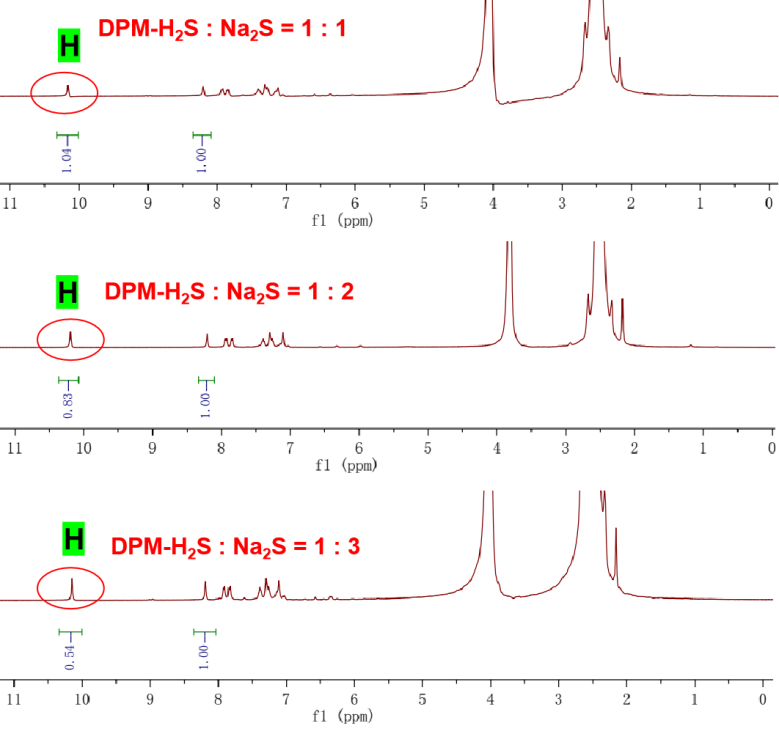


**Figure S1.** 1H NMR spectrum recorded **DPM-H2S** after mixing with Na2S of different proportions in DMSO-*d*6.


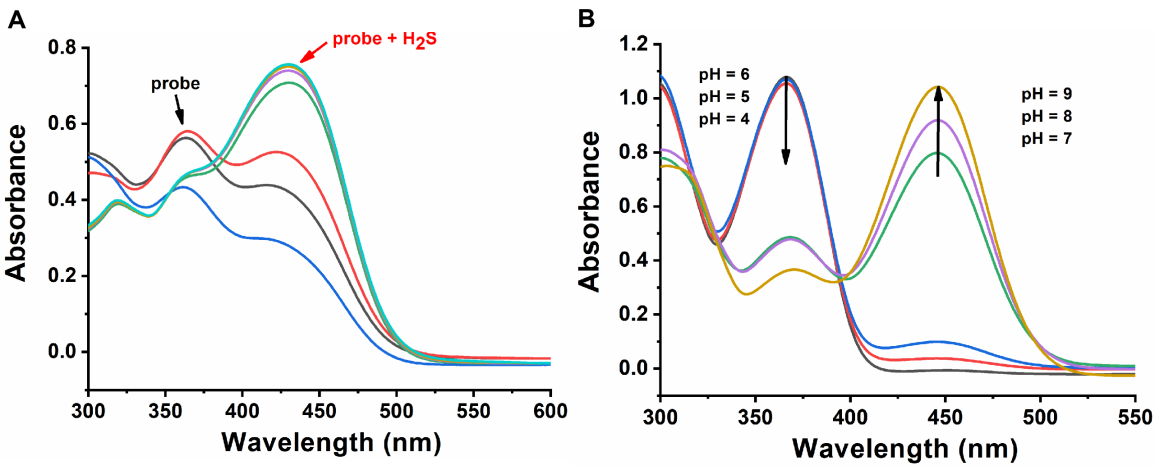


**Figure S2.** The UV-Vis absorbance spectral titration of **DPM-H2S** and the UV-vis spectra of **DPM-H2S** at different pH condition.


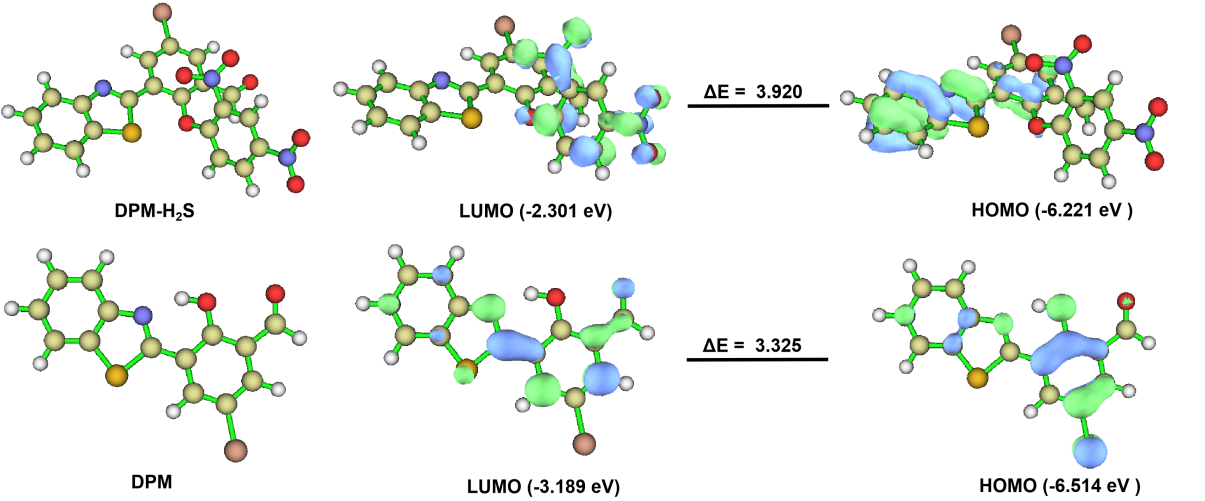


**Figure S3.** Structural optimization and the molecular orbitals of probe **DPM-H2S** and **DPM**.


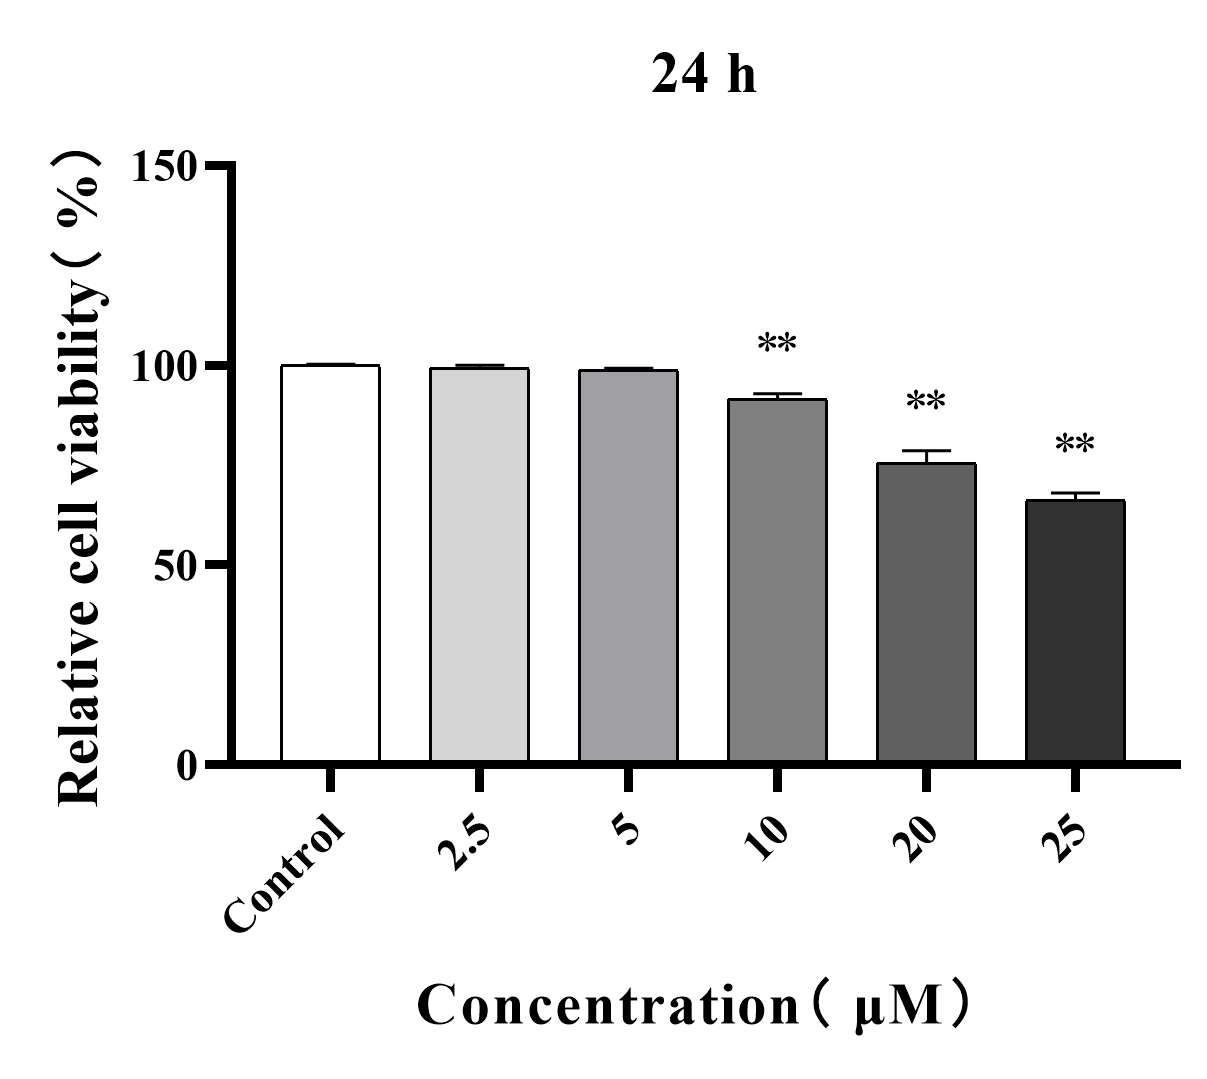


**Figure S4.** Cell viability of HeLa cells treated with different concentrations of **DPM-H2S** for 24 h.


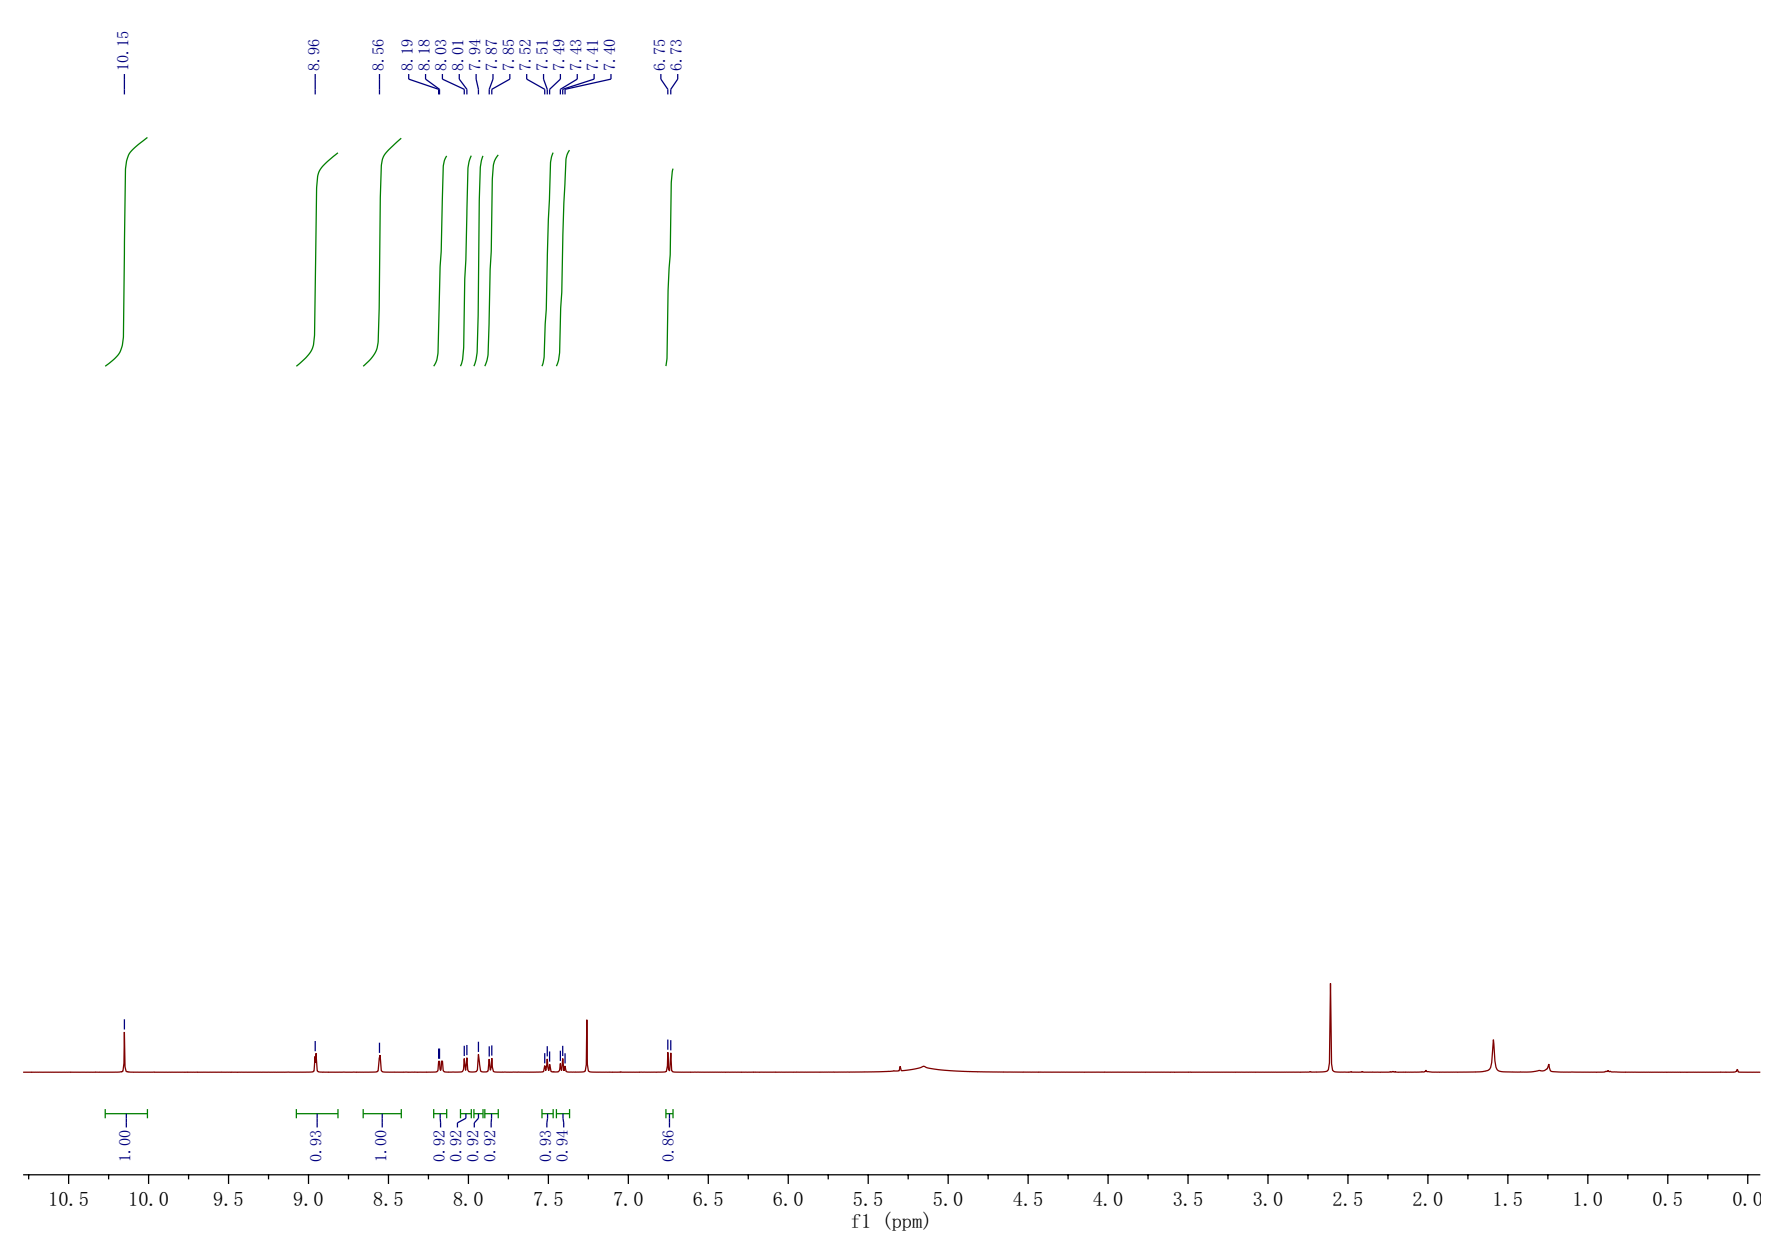


**Figure S5.** 1H NMR spectra of **DPM-H2S** in CDCl3.


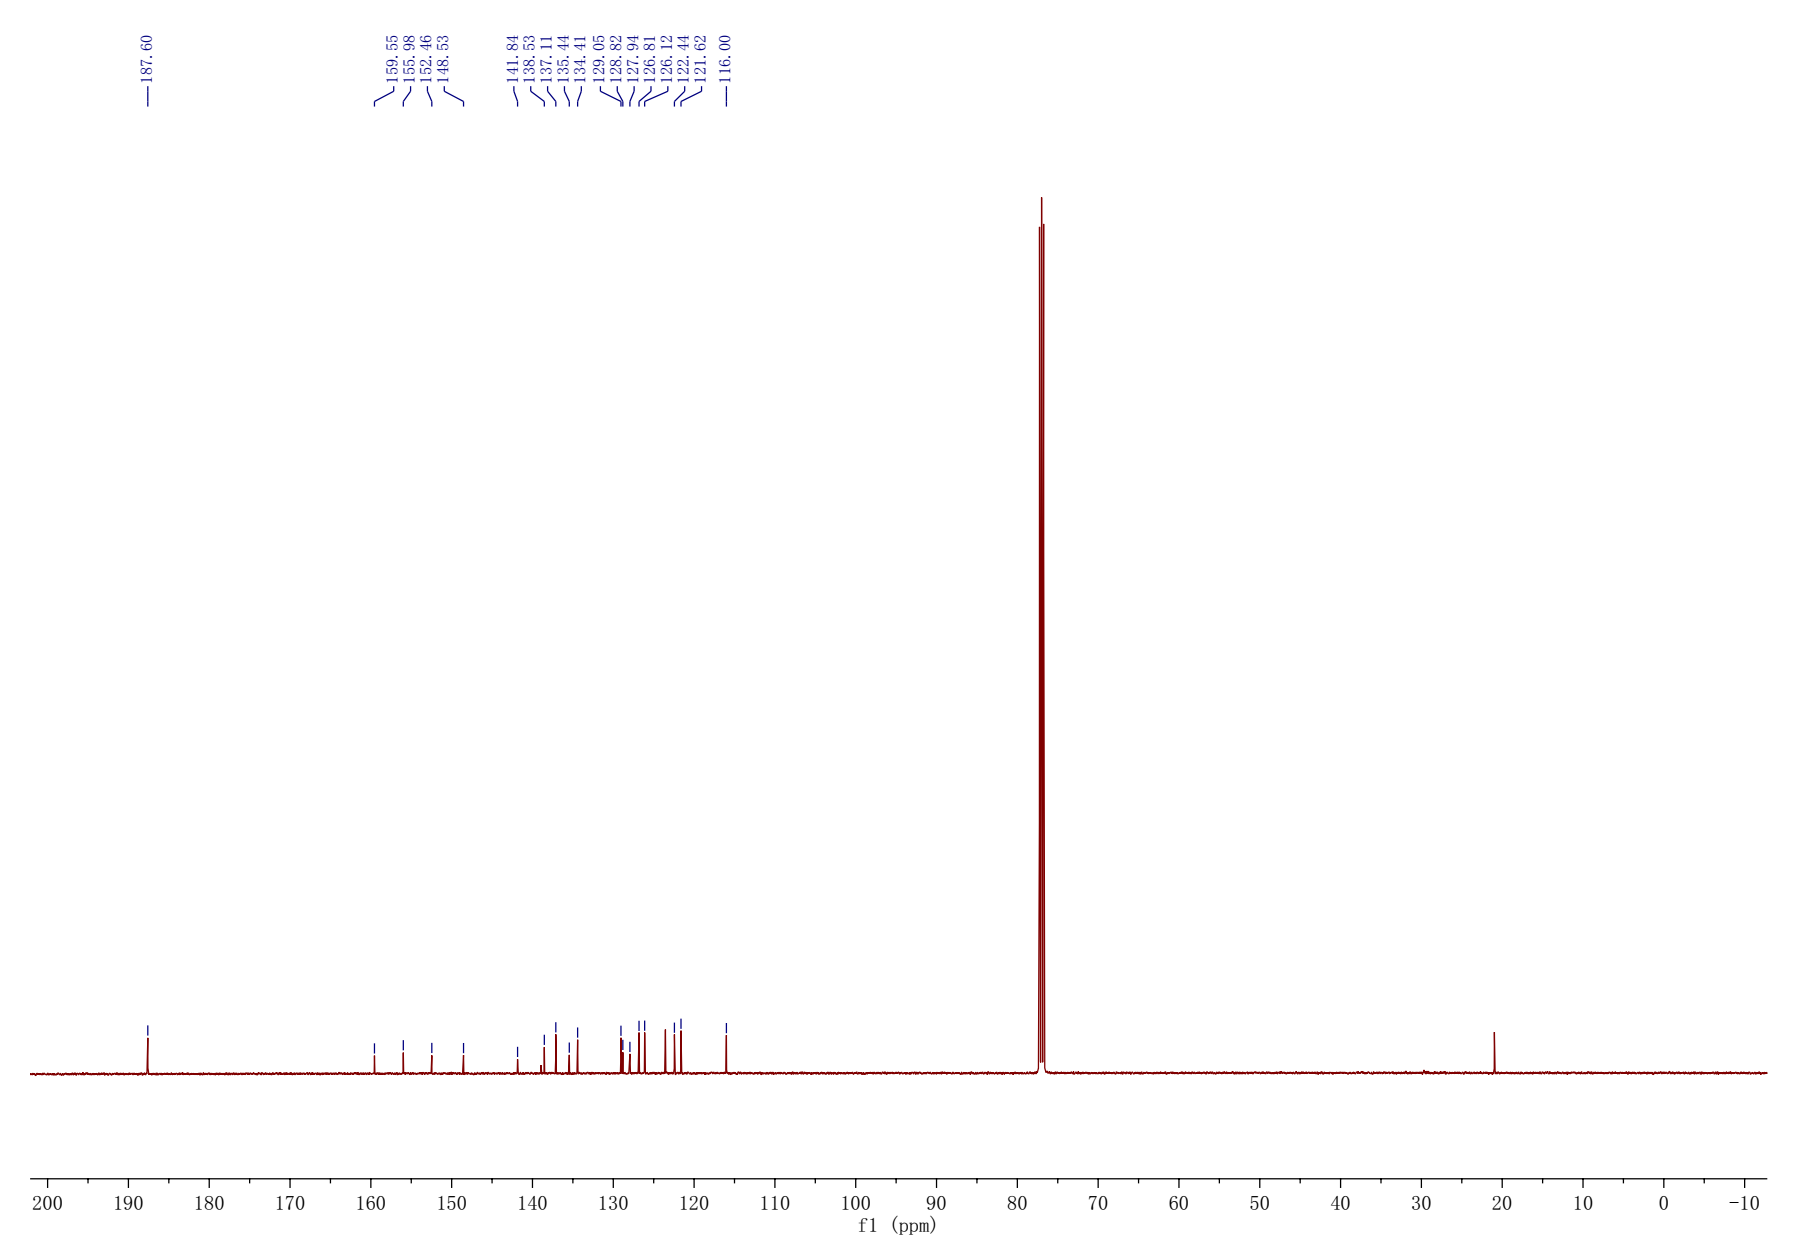


**Figure S6.** 13C NMR spectra of **DPM-H2S** in CDCl3.

**Figure S7.** HRMS spectra of **DPM-H2S**.
